# Supplementary material for: Translation and Validation of the Nomophobia Questionnaire in the Italian Language: Exploratory Factor Analysis
Source: PubMed Central journal article supplement (PMC5799721; doi:10.2196/mhealth.9186), 2018-01-22
Supplement: mhealth_v6i1e24_app1.pdf [file mhealth_v6i1e24_app1.pdf]

Multimedia Appendix 1

---

| <b>Variable</b> | <b>Item</b> | <b>F</b> | <b>Sig.</b> |
|-----------------|-------------|----------|-------------|
| Age             | 1           | .175     | .676        |
|                 | 2           | 1.683    | .195        |
|                 | 3           | .808     | .369        |
|                 | 4           | .003     | .954        |
|                 | 5           | .062     | .804        |
|                 | 6           | .814     | .368        |
|                 | 7           | .034     | .854        |
|                 | 8           | 2.031    | .155        |
|                 | 9           | 3.483    | .063        |
|                 | 10          | 2.905    | .089        |
|                 | 11          | .884     | .348        |
|                 | 12          | .545     | .461        |
|                 | 13          | 1.730    | .189        |
|                 | 14          | .296     | .587        |

|                                               |       |      |
|-----------------------------------------------|-------|------|
| 15                                            | 8.852 | .003 |
| 16                                            | .320  | .572 |
| 17                                            | .121  | .728 |
| 18                                            | .299  | .585 |
| 19                                            | .064  | .801 |
| 20                                            | .294  | .588 |
| Number of hours spent using 1<br>mobile phone | 3.508 | .001 |
| 2                                             | 3.933 | .000 |
| 3                                             | 2.107 | .042 |
| 4                                             | 4.748 | .000 |
| 5                                             | 1.955 | .061 |
| 6                                             | 3.446 | .001 |
| 7                                             | 2.927 | .005 |
| 8                                             | 3.719 | .001 |
| 9                                             | 3.811 | .001 |

|        |    |       |      |
|--------|----|-------|------|
|        | 10 | 3.797 | .001 |
|        | 11 | 1.931 | .064 |
|        | 12 | 1.871 | .073 |
|        | 13 | 1.697 | .109 |
|        | 14 | 1.729 | .101 |
|        | 15 | 3.899 | .000 |
|        | 16 | 7.768 | .000 |
|        | 17 | 3.936 | .000 |
|        | 18 | 6.319 | .000 |
|        | 19 | 2.350 | .024 |
|        | 20 | 8.449 | .000 |
| Gender | 1  | 1.724 | .190 |
|        | 2  | .301  | .583 |
|        | 3  | .003  | .953 |
|        | 4  | .185  | .668 |

|    |       |      |
|----|-------|------|
| 5  | 1.118 | .291 |
| 6  | 1.147 | .285 |
| 7  | .091  | .763 |
| 8  | 2.944 | .087 |
| 9  | 1.678 | .196 |
| 10 | 2.452 | .118 |
| 11 | 3.186 | .075 |
| 12 | .008  | .930 |
| 13 | 1.303 | .254 |
| 14 | .055  | .815 |
| 15 | .643  | .423 |
| 16 | .483  | .488 |
| 17 | 1.501 | .221 |
| 18 | .022  | .883 |
| 19 | 2.510 | .114 |

|                 |    |       |      |
|-----------------|----|-------|------|
|                 | 20 | .576  | .449 |
| Schooling level | 1  | 1.975 | .098 |
|                 | 2  | 2.149 | .074 |
|                 | 3  | .769  | .546 |
|                 | 4  | 1.035 | .389 |
|                 | 5  | 2.056 | .086 |
|                 | 6  | 1.623 | .168 |
|                 | 7  | 1.198 | .312 |
|                 | 8  | 1.333 | .257 |
|                 | 9  | 2.927 | .021 |
|                 | 10 | 3.977 | .004 |
|                 | 11 | 1.381 | .240 |
|                 | 12 | 1.262 | .285 |
|                 | 13 | 2.584 | .037 |
|                 | 14 | 1.082 | .365 |

|                                                        |       |      |
|--------------------------------------------------------|-------|------|
| 15                                                     | 2.064 | .085 |
| 16                                                     | 1.714 | .146 |
| 17                                                     | 1.427 | .224 |
| 18                                                     | 1.633 | .165 |
| 19                                                     | 2.054 | .086 |
| 20                                                     | .545  | .703 |
| Number of hours spent using 1<br>mobile phone * gender | 1.244 | .278 |
| 2                                                      | 1.756 | .095 |
| 3                                                      | 1.579 | .140 |
| 4                                                      | 1.200 | .302 |
| 5                                                      | .499  | .835 |
| 6                                                      | .202  | .985 |
| 7                                                      | 1.832 | .080 |
| 8                                                      | .831  | .562 |
| 9                                                      | 1.381 | .212 |

|                                                                    |    |       |      |
|--------------------------------------------------------------------|----|-------|------|
|                                                                    | 10 | 2.493 | .016 |
|                                                                    | 11 | 1.395 | .206 |
|                                                                    | 12 | .619  | .740 |
|                                                                    | 13 | 1.687 | .111 |
|                                                                    | 14 | 1.080 | .376 |
|                                                                    | 15 | 1.099 | .363 |
|                                                                    | 16 | 1.200 | .302 |
|                                                                    | 17 | .795  | .592 |
|                                                                    | 18 | .416  | .892 |
|                                                                    | 19 | 1.869 | .074 |
|                                                                    | 20 | .639  | .724 |
| Number of hours spent using 1<br>mobile phone * schooling<br>level |    | 1.136 | .310 |
|                                                                    | 2  | 1.515 | .073 |
|                                                                    | 3  | 1.404 | .117 |
|                                                                    | 4  | .661  | .864 |

|    |       |      |
|----|-------|------|
| 5  | .839  | .666 |
| 6  | 1.136 | .310 |
| 7  | 1.027 | .429 |
| 8  | 1.202 | .250 |
| 9  | 2.138 | .003 |
| 10 | 1.631 | .044 |
| 11 | 1.805 | .019 |
| 12 | 1.573 | .057 |
| 13 | 1.442 | .100 |
| 14 | 1.410 | .114 |
| 15 | 1.161 | .286 |
| 16 | 1.307 | .171 |
| 17 | 1.578 | .056 |
| 18 | 1.932 | .010 |
| 19 | 1.341 | .150 |



|                          |    |       |      |
|--------------------------|----|-------|------|
|                          | 20 | 1.132 | .315 |
| Gender * schooling level | 1  | 2.031 | .109 |
|                          | 2  | 3.179 | .024 |
|                          | 3  | 5.821 | .001 |
|                          | 4  | 3.337 | .020 |
|                          | 5  | 4.341 | .005 |
|                          | 6  | 1.921 | .126 |
|                          | 7  | .538  | .657 |
|                          | 8  | .786  | .502 |
|                          | 9  | .384  | .765 |
|                          | 10 | 1.160 | .325 |
|                          | 11 | 1.471 | .222 |
|                          | 12 | 1.603 | .188 |
|                          | 13 | 1.451 | .228 |
|                          | 14 | .139  | .936 |

|                                                                             |    |       |      |
|-----------------------------------------------------------------------------|----|-------|------|
|                                                                             | 15 | 1.043 | .374 |
|                                                                             | 16 | .079  | .971 |
|                                                                             | 17 | .641  | .589 |
|                                                                             | 18 | .105  | .957 |
|                                                                             | 19 | .185  | .907 |
|                                                                             | 20 | 2.089 | .101 |
| Number of hours spent using 1<br>mobile phone * gender *<br>schooling level |    | 1.046 | .407 |
|                                                                             | 2  | 1.079 | .373 |
|                                                                             | 3  | 2.005 | .011 |
|                                                                             | 4  | 1.579 | .067 |
|                                                                             | 5  | 1.134 | .319 |
|                                                                             | 6  | .871  | .609 |
|                                                                             | 7  | .659  | .843 |
|                                                                             | 8  | .983  | .477 |
|                                                                             | 9  | .654  | .847 |

|    |       |      |
|----|-------|------|
| 10 | 1.679 | .045 |
| 11 | 1.415 | .127 |
| 12 | 1.359 | .154 |
| 13 | 1.701 | .041 |
| 14 | .873  | .606 |
| 15 | 1.407 | .130 |
| 16 | 1.585 | .066 |
| 17 | .562  | .919 |
| 18 | 1.047 | .406 |
| 19 | 1.116 | .336 |
| 20 | 1.639 | .053 |

---
